# Supplementary material for: The CD39+ HBV surface protein-targeted CAR-T and personalized tumor-reactive CD8+ T cells exhibit potent anti-HCC activity
Source: PubMed Central journal article supplement — Mol Ther. 2021 Jan 21;29(5):1794–807. doi: 10.1016/j.ymthe.2021.01.021 (PMC8116602; doi:10.1016/j.ymthe.2021.01.021), 2021-01-21
Supplement: mmc1.pdf [file mmc1.pdf]

YMTHE, Volume 29

## **Supplemental Information**

**The CD39<sup>+</sup> HBV surface protein-targeted  
CAR-T and personalized tumor-reactive CD8<sup>+</sup>  
T cells exhibit potent anti-HCC activity**

**Fan Zou, Jizhou Tan, Ting Liu, Bingfeng Liu, Yaping Tang, Hui Zhang, and Jiaping Li**

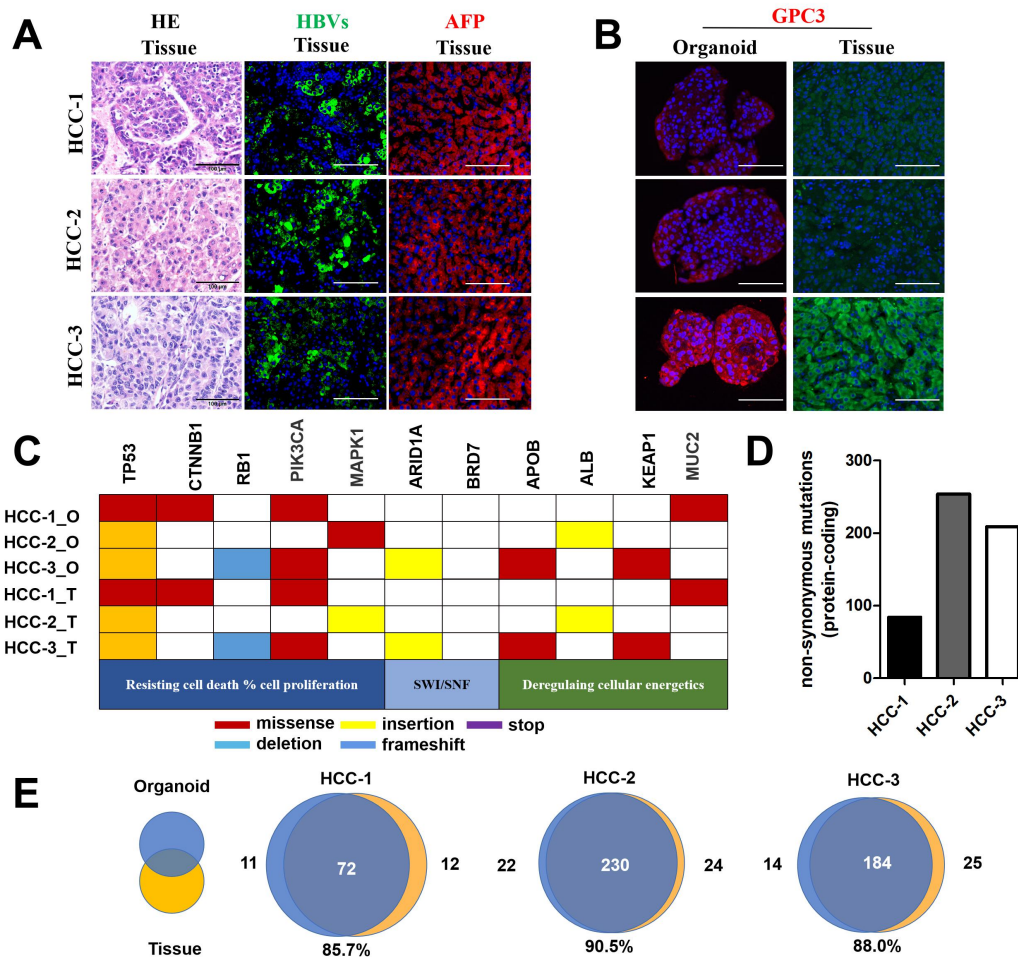

1

2 **Supplementary Figure 1. Immunofluorescent images and repertoire of genetic**  
 3 **characteristics in the HCC originating tissues and their organoids.**

4 (A). Immunofluorescent analysis was used to show the expression of AFP, HBVs  
 5 protein on HCC tissue of three patients.

6 (B). Immunofluorescent analysis was used to show the expression of GPC-3 on HCC  
 7 tissue and organoids of three patients.

8 (C). Tumor mutation burden of non-synonymous mutations of the three patients was  
 9 shown.

10 (D). Repertoire of somatic non-synonymous mutation status of genes significantly  
 11 mutated in HCC according to cWES. Mutation types are indicated in different colors.

12 (E). Venn diagrams illustrate the number of somatic non-synonymous mutations  
13 present in each HCC tissues and HCC organoids.

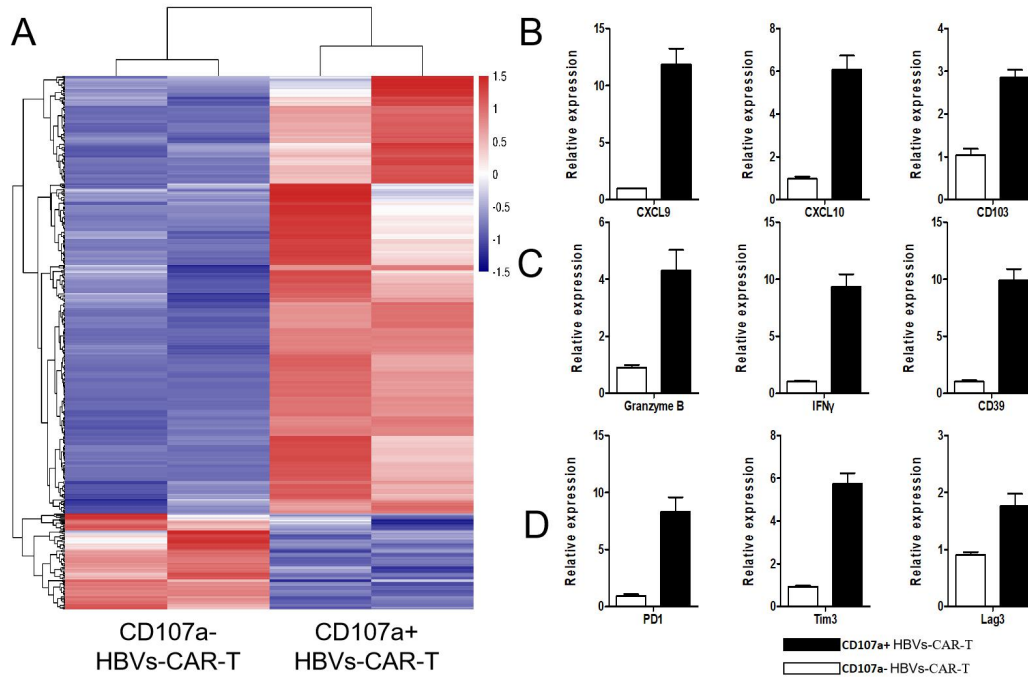

14  
15 **Supplementary Figure 2. Gene expression of CD107a-positive effector**  
16 **HBVs-CAR-T cells.**

17 (A). CAR-T cells were obtained by FACS sorting after co-culture with the E:T ratio of  
18 10:1 for 24 hours. Heatmap of RNA-sequence showed the expression of genes with  
19 P-value < 0.01. RNA expression levels were respectively indicated with a red/blue  
20 scale for high and low expression levels.

21 (B-D). qRT-PCR revealed the relative mRNA expression level of genes in  
22 CD107a<sup>+</sup>/CD107a<sup>-</sup> HBVs-CAR-T cells respectively.

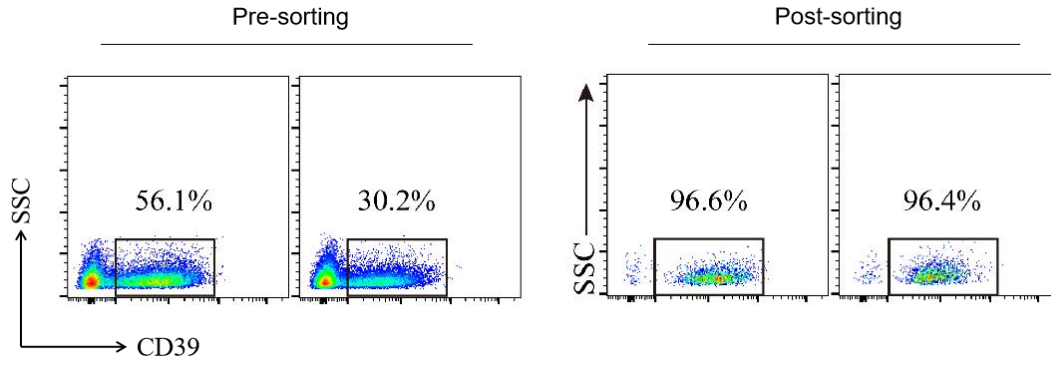

23

24 **Supplementary Figure 3. Sorting efficacy of CD39<sup>+</sup> HBVs-CAR T cells by flow**  
 25 **sorting.**

26 Sorting efficacy of CD39<sup>+</sup> HBVs-CAR T cells by FACS could achieve over 95%.

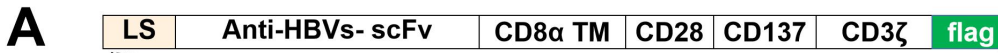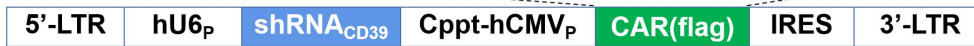

|                  |                                                                     |
|------------------|---------------------------------------------------------------------|
| Target gene      | CD39                                                                |
| Name in the text | sh-CD39                                                             |
| Forward sequence | 5'-CCGG CTATGTCTTCCTCATGGTT CTCGAG<br>AACCATGAGGAAGACAUAG TTTTGG-3' |

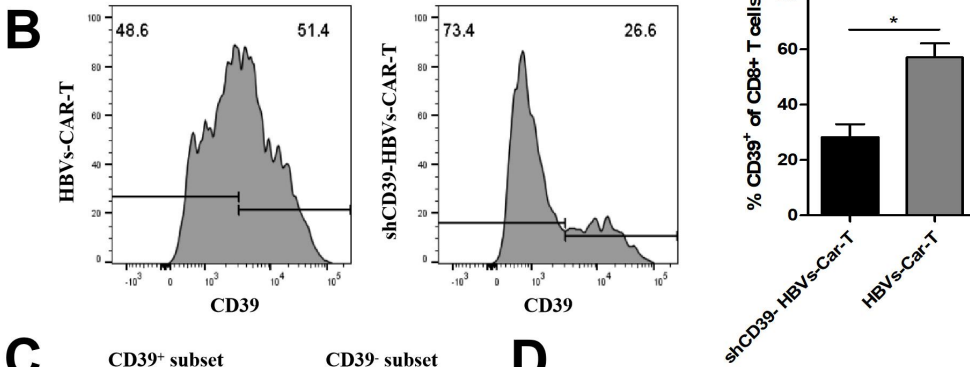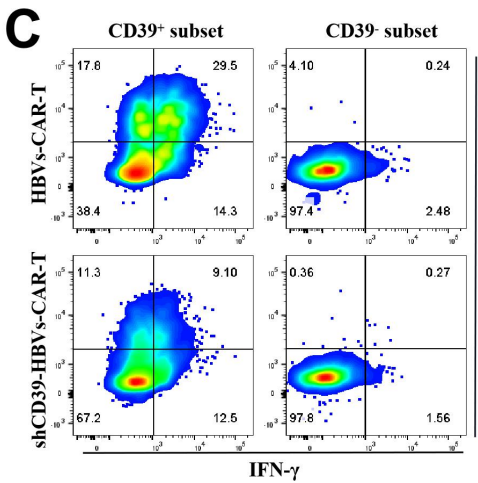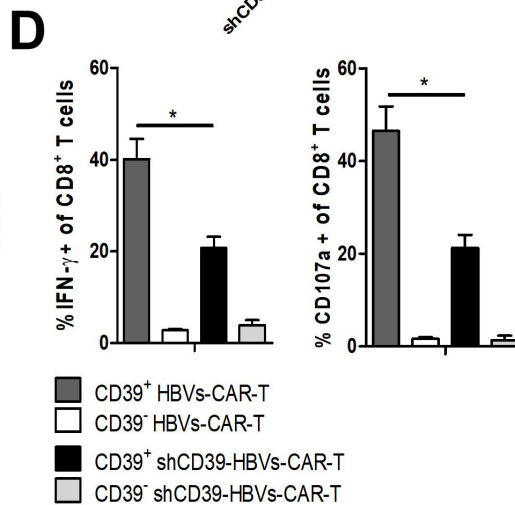

27

28 **Supplementary Figure 4. Knock-down CD39 on HBVs-CAR-T cells resulted in**  
 29 **a decreased cytotoxic T lymphocyte activity.**

30 (A) . Schematic representation of the lentiviral vectors carrying a HBVs-specific  
 31 CAR moiety and a cluster of sh-CD39.

32 (B) . Flow cytometry revealed the knock-down efficiency of CD39 on HBVs-CAR-T  
 33 cells.

34 (C-D). Relative quantification of IFN- $\gamma$  production and CD107a expression in  
 35 CD39<sup>+</sup>/CD39<sup>-</sup>CD8<sup>+</sup> HBVs-CAR-T and shCD39-HBVs-CAR-T cells. Error bars  
 36 represent SEM of three biological replicates.

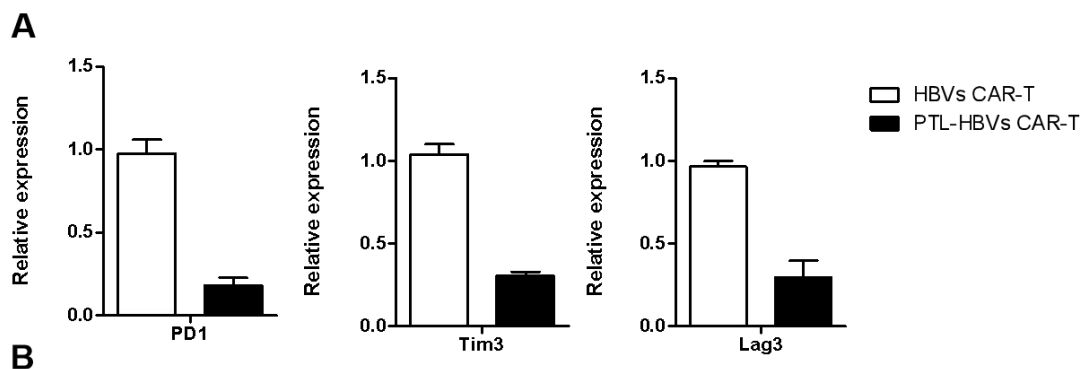

**B**

| Target gene | Name in the text | Target sequence      |
|-------------|------------------|----------------------|
| PD-1        | sh-PD-1          | GCTTCGTGCTAAACTGGTA  |
| Tim-3       | sh-Tim-3         | ACTCTAGATTGGCCAAIGA  |
| Lag-3       | sh-Lag-3         | TGGCGACTTTACCCCTTCGA |

37

38 **Supplementary Figure 5. HBVs-specific CAR-T cells carrying various**  
 39 **co-receptor-specific shRNAs.**

40 (A). Relative mRNA expression level of inhibitory receptors in HBVs-CAR-T cells  
 41 with down-regulation of PD-1, Lag-3, or Tim-3 respectively (14 days post infection)

42 ( $n = 3$ , 3 healthy donors).

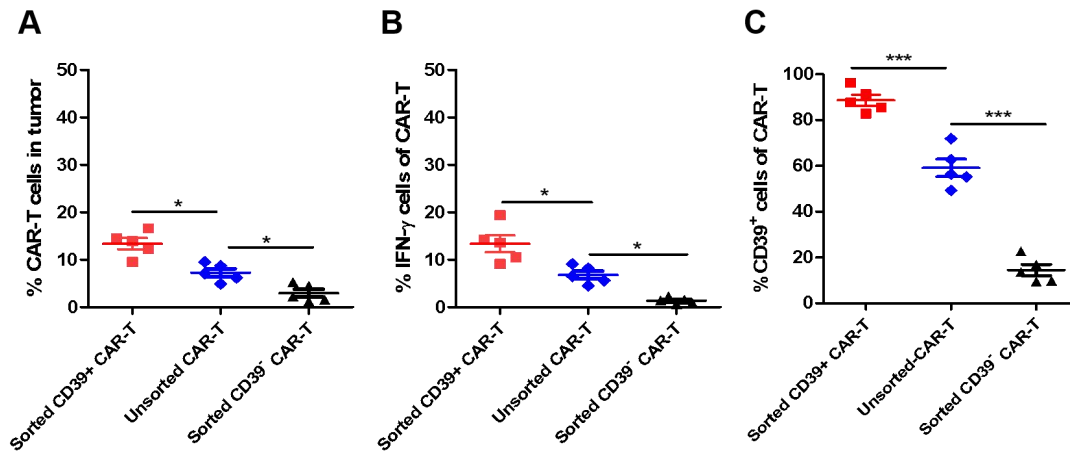

43

44 **Supplementary Figure 6. Sorted CD39<sup>+</sup> HBVs-CAR-T exerted stronger**  
 45 **cytotoxicity than unsorted HBVs-CAR-T in vivo.**

46 HBVs-CAR-T cells were generated as previously described, and divided into sorted  
 47 CD39<sup>+/-</sup> groups and unsorted group. T cells was adoptive transferred into NSG mice  
 48 with HCC PDX model. Each mouse was injected  $1 \times 10^6$  T cells (sorted CD39<sup>+</sup>, sorted  
 49 CD39<sup>-</sup>, and unsorted CAR-T) via a single intravenous (i.v.) injection. On day 14,  
 50 tumor tissues were collected and digested. Tumor infiltrating T cells were tested by  
 51 Flow cytometry.

52 (A). Flow cytometry revealed the frequency of infiltrating CAR-T cells.

53 (B-C). The frequency of IFN- $\gamma$  positive and CD39 positive in CAR-T cells were  
 54 shown.
